# Supplementary material for: Nonlinear optical ASnX (A = Na, H; X = N, P) nanosheets with divalent tin lone electron pair effect by first-principles design
Source: Royal Society of Chemistry journal article supplement (doi:10.1039/d0nr03778h), 2020-01-01

## ***Supporting Information for***

### **Nonlinear Optical ASnX (A = Na, H; X = N, P) Nanosheets with Divalent Tin Lone Electron Pair Effect by First-Principles Design**

Shengzi Zhang,<sup>ac</sup> Lei Kang<sup>\*a</sup> and Zheshuai Lin<sup>\*ab</sup>

<sup>a</sup> Technical Institute of Physics and Chemistry, Chinese Academy of Sciences, Beijing 100190, China

<sup>b</sup> Center of Materials Science and Optoelectronics Engineering, University of Chinese Academy of Sciences, Beijing 100049, China

<sup>c</sup> University of Chinese Academy of Sciences, Beijing 100049, China

### **List of Content**

- 1. Table S1** Experimental and calculated crystallographic data of ZnGeP<sub>2</sub> and NaSnX (X = N, P). It can be found that the LDA results are sufficiently accurate for the calculations of lattice constants.
- 2. Figure S1.** First-principles analysis of electron localization function (ELF) for NaSnN.
- 3. Table S2.** Detailed VE and VH contribution to the total SHG coefficient  $d_{ijk}$  as shown in Figure 3.
- 4. Figure S2.** Crystal structures (a), band structures (b) and PDOS (c) of the NaSnN bilayer, tri-layer and multi-layer (e.g., 5L)
- 5. Figure S3.** Phonon vibration spectra of HSnN monolayer (ML) (a), 15%-strained NaSnN ML (b), NaSnP ML (c) and HSnP ML (d).
- 6. Figure S4.** Interaction energies of HSnN, NaSnP and MoS<sub>2</sub> with respect to the interlayer distance.

1. **Table S1** Experimental and calculated crystallographic data of ZnGeP<sub>2</sub> and NaSnX (X = N, P). It can be found that the LDA results are sufficiently accurate for the calculations of lattice constants.

|                    |                | a=b (Å) | (relative error) | c (Å)  | (relative error) |
|--------------------|----------------|---------|------------------|--------|------------------|
| ZnGeP <sub>2</sub> | Exp.           | 5.465   |                  | 10.711 |                  |
|                    | Cal. by LDA    | 5.387   | (-1.4%)          | 10.496 | (-2.0%)          |
|                    | Cal. by sX-LDA | 5.270   | (-3.6%)          | 10.342 | (-3.4%)          |
| NaSnN              | Exp.           | 3.331   |                  | 10.892 |                  |
|                    | Cal. by LDA    | 3.201   | (-3.9%)          | 10.773 | (-1.1%)          |
|                    | Cal. by sX-LDA | 3.176   | (-4.7%)          | 10.774 | (-1.1%)          |
| NaSnP              | Exp.           | 3.880   |                  | 11.667 |                  |
|                    | Cal. by LDA    | 3.775   | (-2.7%)          | 11.602 | (-0.6%)          |
|                    | Cal. by sX-LDA | 3.795   | (-2.2%)          | 11.664 | (-0.0%)          |

2. **Figure S1.** First-principles analysis of electron localization function (ELF) for NaSnN.

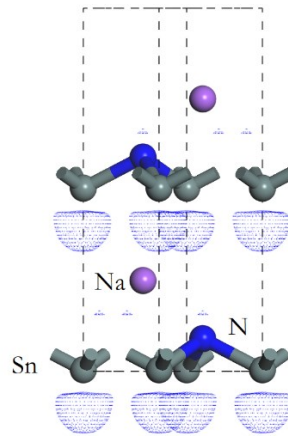

3. **Table S2.** Detailed VE and VH contribution to the total SHG coefficient  $d_{ijk}$  as shown in Figure 3.

| System |                  | $d_{ijk}$ (pm/V)                   | VE (pm/V)                     | VH (pm/V)                      |
|--------|------------------|------------------------------------|-------------------------------|--------------------------------|
| NaSnN  | Bulk             | Cal. $d_{333}=27$                  | $d_{333}=18$                  | $d_{333}=9.4$                  |
| HSnN   | ML               | Cal. $d_{111}=147$                 | $d_{111}=256$                 | $d_{111}=-108$                 |
| NaSnN  | ML <sup>a)</sup> | Cal. $d_{113}=301$ ; $d_{333}=277$ | $d_{113}=259$ ; $d_{333}=395$ | $d_{113}=42$ ; $d_{333}=-118$  |
| NaSnP  | Bulk             | Cal. $d_{333}=16$                  | $d_{333}=6.7$                 | $d_{333}=9.7$                  |
| NaSnP  | ML               | Cal. $d_{113}=618$ ; $d_{333}=533$ | $d_{113}=565$ ; $d_{333}=662$ | $d_{113}=54$ ; $d_{333}=-130$  |
| HSnP   | ML               | Cal. $d_{111}=12$ ; $d_{333}=-14$  | $d_{111}=43$ ; $d_{333}=-9.4$ | $d_{111}=-31$ ; $d_{333}=-4.8$ |

<sup>a)</sup> strain is 15%

4. **Figure S2.** Crystal structures (a), band structures (b) and PDOS (c) of the NaSnN bilayer, tri-layer and

multi-layer (e.g., 5L)

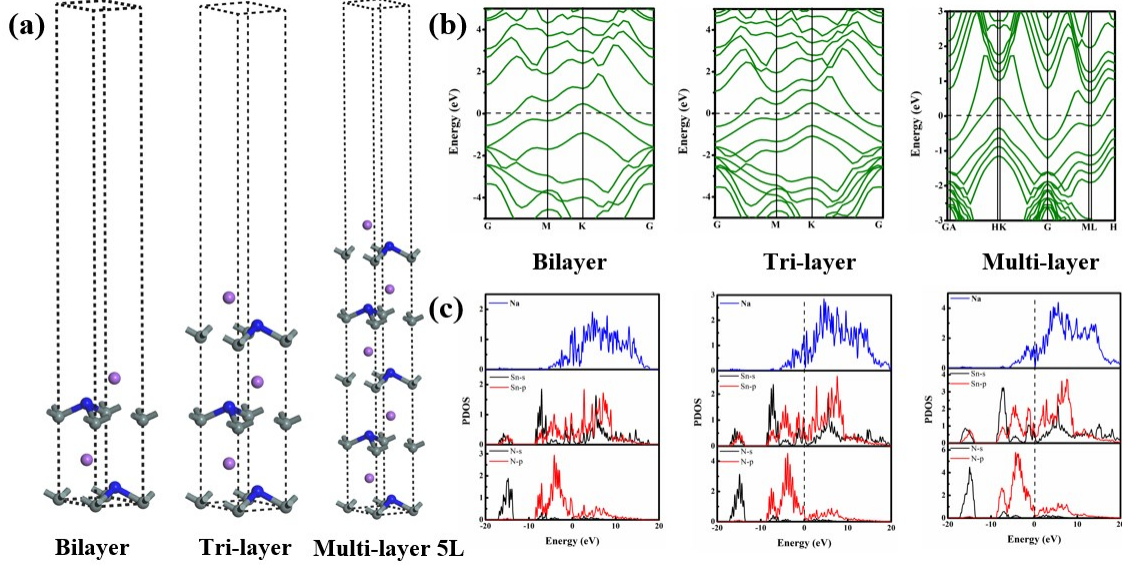

5. **Figure S3.** Phonon vibration spectra of HSnn monolayer (ML) (a), 15%-strained NaSnN ML (b), NaSnP ML (c) and HSnP ML (d).

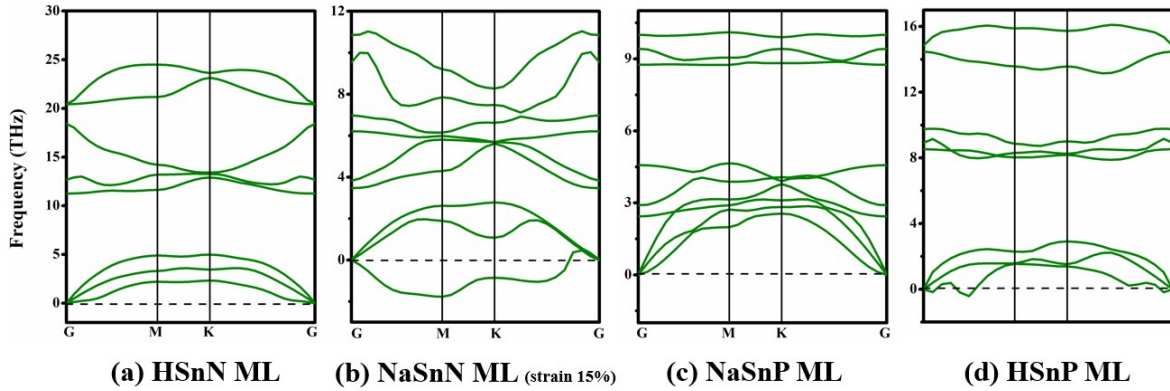

6. **Figure S4.** Interaction energies of HSnn, NaSnP and MoS<sub>2</sub> with respect to the interlayer distance.

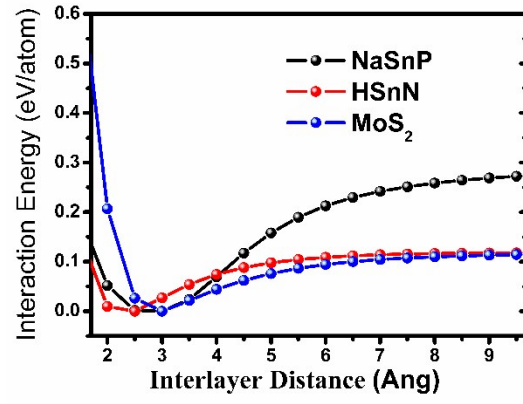

Supplement: d0nr03778h1.pdf [file d0nr03778h1.pdf]
